# Supplementary material for: Urinary melatonin-sulfate/cortisol ratio and the presence of prostate cancer: A case-control study
Source: Springer Nature journal article supplement (doi:10.1038/srep29606), 2016-07-08
Supplement: 41598_2016_BFsrep29606_MOESM63_ESM.pdf [file 41598_2016_BFsrep29606_MOESM63_ESM.pdf]

## Supplementary Material

### Urinary melatonin-sulfate / cortisol ratio and the presence of prostate cancer: A case-control study

Shu-Yu Tai<sup>1,2,3,4</sup>, Shu-Pin Huang<sup>5,6,7</sup>, Bo-Ying Bao<sup>8,9,10</sup> & Ming-Tsang Wu<sup>4,11,12</sup>

<sup>1</sup>Graduate Institute of Medicine, College of Medicine, Kaohsiung Medical University, Kaohsiung, Taiwan. <sup>2</sup>Department of Family Medicine, School of Medicine, College of Medicine, Kaohsiung Medical University, Kaohsiung, Taiwan.

<sup>3</sup>Department of Family Medicine, Kaohsiung Municipal Ta-Tung Hospital,

Kaohsiung, Taiwan. <sup>4</sup>Department of Family Medicine, Kaohsiung Medical University Hospital, Kaohsiung Medical University, Kaohsiung, Taiwan.

<sup>5</sup>Department of Urology, Kaohsiung Medical University Hospital, Kaohsiung Medical University, Kaohsiung, Taiwan. <sup>6</sup>Department of Urology, Faculty of Medicine, College of Medicine, Kaohsiung Medical University, Kaohsiung, Taiwan.

<sup>7</sup>Institute of Biomedical Science, National Sun Yat-Sen University. <sup>8</sup>Department of Pharmacy, China Medical University, Taichung, Taiwan. <sup>9</sup>Sex Hormone Research

Center, China Medical University Hospital, Taichung, Taiwan. <sup>10</sup>Department

of Nursing, Asia University, Taichung, Taiwan. <sup>11</sup>Department of Public Health,

Kaohsiung Medical University, Kaohsiung, Taiwan. <sup>12</sup>Center of Environmental and

Occupational Medicine, Kaohsiung Municipal Hsiao-Kang Hospital, Kaohsiung

Medical University, Kaohsiung, Taiwan.

**Running title:** Melatonin and the Prostate Cancer

Correspondence and requests for materials should be addressed to M.T.W. Room

721, CS Building, 100 Shih-Chuan 1st Road, Kaohsiung, Taiwan. Tel:

+886-7-312-1101 ext. 2141 ext. 55; fax: +886-7-3221806 (email:

960021@ms.kmuh.org.tw or e\_encourage@yahoo.com)

**Supplementary Table S1. Joint risks of urinary melatonin or cortisol level and the PSA level associated with the presence of prostate cancer.**

| Factor/category              |                  | Controls  | Cases     |             |                   |                  |                   |
|------------------------------|------------------|-----------|-----------|-------------|-------------------|------------------|-------------------|
|                              |                  | N=240     | N=120     |             |                   |                  |                   |
|                              |                  | N (%)     |           | OR          | 95% CI            | aOR <sup>1</sup> | 95% CI            |
| <b>Melatonin<sup>2</sup></b> | <b>PSA level</b> |           |           |             |                   |                  |                   |
| High                         | < 10             | 70 (30.6) | 12 (10.1) | 1.0         | (Ref)             | 1.0              | (Ref)             |
| Low                          | < 10             | 50 (21.8) | 14 (11.7) | 1.63        | 0.70-3.83         | 1.63             | 0.69-3.88         |
| High                         | ≥ 10             | 54 (23.6) | 34 (28.6) | <b>3.67</b> | <b>1.74-7.76</b>  | <b>3.71</b>      | <b>1.73-7.94</b>  |
| Low                          | ≥ 10             | 55 (24.0) | 59 (49.6) | <b>6.26</b> | <b>3.06-12.78</b> | <b>6.58</b>      | <b>3.16-13.71</b> |
| <b>Cortisol<sup>2</sup></b>  | <b>PSA level</b> |           |           |             |                   |                  |                   |

|      |      |           |           |             |                   |             |                   |
|------|------|-----------|-----------|-------------|-------------------|-------------|-------------------|
| Low  | < 10 | 61 (26.6) | 11 (9.2)  | 1.0         | (Ref)             | 1.0         | (Ref)             |
| High | < 10 | 59 (25.8) | 15 (12.6) | 1.41        | 0.60-3.32         | 1.42        | 0.60-3.39         |
| Low  | ≥ 10 | 62 (27.1) | 39 (32.8) | <b>3.49</b> | <b>1.64-7.43</b>  | <b>3.71</b> | <b>1.71-8.04</b>  |
| High | ≥ 10 | 47 (20.5) | 54 (45.4) | <b>6.37</b> | <b>3.00-13.51</b> | <b>6.33</b> | <b>2.94-13.61</b> |

---

<sup>1</sup>Adjusting for age (< 65 vs. ≥ 65 yr), personal habits of smoking, alcohol, betel nut, family history of prostate cancer, and prostate-specific antigen level (<10 vs. ≥ 10 ng/ml).

<sup>2</sup>Medians of 43.23 ng/mg creatinine for melatonin, 24.06 ng/mg creatinine for cortisol, and 1.76 for MT/C ratio.

**Supplementary Table S2. Joint risks of urinary melatonin or cortisol level and the PSA level associated with clinical staging of prostate cancer.**

| Factor/category              |              | Control   | Localized <sup>1</sup> | Advanced <sup>1</sup> | Localized <sup>1</sup> vs. | Advanced <sup>1</sup> vs. | Advanced <sup>1</sup> vs. Localized <sup>1</sup> |                   |                  |                   |
|------------------------------|--------------|-----------|------------------------|-----------------------|----------------------------|---------------------------|--------------------------------------------------|-------------------|------------------|-------------------|
|                              |              | N=240     | N=51                   | N=69                  | control                    | control                   |                                                  |                   |                  |                   |
|                              |              | N (%)     |                        |                       | aOR <sup>2</sup>           | (95%CI)                   | aOR <sup>2</sup>                                 | (95%CI)           | aOR <sup>2</sup> | (95%CI)           |
|                              | <b>PSA</b>   |           |                        |                       |                            |                           |                                                  |                   |                  |                   |
| <b>Melatonin<sup>3</sup></b> | <b>level</b> |           |                        |                       |                            |                           |                                                  |                   |                  |                   |
| High                         | < 10         | 70 (30.6) | 9(18.0)                | 3 (2.5)               | 1.0                        | (Ref)                     | 1.0                                              | (Ref)             | 1.0              | (Ref)             |
| Low                          | < 10         | 50 (21.8) | 9 (18.0)               | 5 (4.2)               | 1.38                       | 0.51-3.77                 | 2.34                                             | 0.53-10.35        | 1.69             | 0.30-9.42         |
| High                         | ≥ 10         | 54 (23.6) | 14 (28.0)              | 20 (16.8)             | 2.24                       | 0.91-5.55                 | <b>8.11</b>                                      | <b>2.25-29.33</b> | 3.62             | 0.82-15.95        |
| Low                          | ≥ 10         | 55 (24.0) | 18 (36.0)              | 41 (34.5)             | <b>2.92</b>                | <b>1.21-7.04</b>          | <b>18.06</b>                                     | <b>5.19-62.85</b> | <b>6.19</b>      | <b>1.47-25.97</b> |

---

| Cortisol <sup>3</sup> | PSA   |           |           |           |             |                  |              |                   |             |                   |
|-----------------------|-------|-----------|-----------|-----------|-------------|------------------|--------------|-------------------|-------------|-------------------|
|                       | level |           |           |           |             |                  |              |                   |             |                   |
| Low                   | < 10  | 61 (26.6) | 7 (14.0)  | 4 (5.8)   | 1.0         | (Ref)            | 1.0          | (Ref)             | 1.0         | (Ref)             |
| High                  | < 10  | 59 (25.8) | 11 (22.0) | 4 (5.8)   | 1.61        | 0.58-4.48        | 1.05         | 0.25-4.47         | 0.66        | 0.12-3.57         |
| Low                   | ≥ 10  | 62 (27.1) | 17 (34.0) | 22 (31.9) | <b>2.87</b> | <b>1.11-7.42</b> | <b>5.11</b>  | <b>1.61-16.22</b> | 1.78        | 0.44-7.22         |
| High                  | ≥ 10  | 47 (20.5) | 15 (30.0) | 39 (56.5) | <b>2.91</b> | <b>1.09-7.75</b> | <b>12.74</b> | <b>4.17-38.91</b> | <b>4.38</b> | <b>1.10-17.36</b> |

---

PSA = prostate-specific antigen.

<sup>1</sup>Localized PCa defined as stage T1 or T2 at diagnosis; Advanced PCa defined as stage T3 or T4 and or LN or distant metastases at diagnosis

<sup>2</sup>Adjusting for the same variables in Table 2.

<sup>3</sup>Medians of 43.23 ng/mg creatinine for melatonin, 24.06 ng/mg creatinine for cortisol, and 1.76 for MT/C ratio.
